# Supplementary material for: Genomic evaluation for a three-way crossbreeding system considering breed-of-origin of alleles
Source: PubMed Central journal article supplement (PMC5653471; doi:10.1186/s12711-017-0350-1), 2017-10-23
Supplement: 12711_2017_350_MOESM1_ESM.pdf [file 12711_2017_350_MOESM1_ESM.pdf]

| Model          | Breed | $\sigma_{aPB}^2$ | $\sigma_{uPB}^2$ | $\sigma_{ePB}^2$ | $h_{PB}^2$ | $\sigma_{aCB}^2$ | $\sigma_{uCB}^2$ * | $\sigma_{eCB}^2$ * | $h_{CB}^2$ | $r_{pc}$ |
|----------------|-------|------------------|------------------|------------------|------------|------------------|--------------------|--------------------|------------|----------|
| ADG            |       |                  |                  |                  |            |                  |                    |                    |            |          |
| BOA            | S     | 374              | 330              | 307              | 0.03       | 509              | 170                | 201                | 0.07       | 0.13     |
|                | LR    | 309              | 252              | 221              | 0.03       | 882              |                    |                    |            | 0.18     |
|                | LW    | 196              | 144              | 137              | 0.02       | 811              |                    |                    |            | 0.18     |
| G <sub>A</sub> | S     | 453              | 327              | 305              | 0.03       | 323              | 152                | 209                | 0.05       | 0.13     |
|                | LR    | 347              | 253              | 222              | 0.03       |                  |                    |                    |            | 0.17     |
|                | LW    | 214              | 143              | 137              | 0.02       |                  |                    |                    |            | 0.12     |
| G <sub>B</sub> | S     | 372              | 327              | 305              | 0.03       | 357              | 152                | 209                | 0.05       | 0.12     |
|                | LR    | 316              | 252              | 222              | 0.03       |                  |                    |                    |            | 0.16     |
|                | LW    | 197              | 146              | 137              | 0.02       |                  |                    |                    |            | 0.11     |
| BF             |       |                  |                  |                  |            |                  |                    |                    |            |          |
| BOA            | S     | 0.09             | 0.07             | 0.07             | 0.03       | 0.46             | 0.17               | 0.19               | 0.06       | 0.12     |
|                | LR    | 0.11             | 0.08             | 0.08             | 0.03       | 0.77             |                    |                    |            | 0.15     |
|                | LW    | 0.09             | 0.06             | 0.05             | 0.02       | 0.90             |                    |                    |            | 0.12     |
| G <sub>A</sub> | S     | 0.11             | 0.07             | 0.07             | 0.03       | 0.30             | 0.15               | 0.19               | 0.05       | 0.10     |
|                | LR    | 0.12             | 0.08             | 0.08             | 0.03       |                  |                    |                    |            | 0.12     |
|                | LW    | 0.10             | 0.06             | 0.05             | 0.02       |                  |                    |                    |            | 0.10     |
| G <sub>B</sub> | S     | 0.09             | 0.07             | 0.07             | 0.03       | 0.34             | 0.15               | 0.20               | 0.05       | 0.10     |
|                | LR    | 0.11             | 0.08             | 0.08             | 0.03       |                  |                    |                    |            | 0.12     |
|                | LW    | 0.09             | 0.06             | 0.05             | 0.02       |                  |                    |                    |            | 0.09     |
| LD             |       |                  |                  |                  |            |                  |                    |                    |            |          |
| BOA            | S     | 0.99             | 0.66             | 0.53             | 0.03       | 2.97             | 0.93               | 1.38               | 0.07       | 0.12     |
|                | LR    | 0.65             | 0.44             | 0.41             | 0.03       | 3.72             |                    |                    |            | 0.29     |
|                | LW    | 0.45             | 0.27             | 0.22             | 0.02       | 4.83             |                    |                    |            | 0.17     |
| G <sub>A</sub> | S     | 1.19             | 0.65             | 0.53             | 0.03       | 1.67             | 0.57               | 1.42               | 0.04       | 0.12     |
|                | LR    | 0.72             | 0.43             | 0.41             | 0.03       |                  |                    |                    |            | 0.17     |
|                | LW    | 0.48             | 0.27             | 0.22             | 0.02       |                  |                    |                    |            | 0.12     |
| G <sub>B</sub> | S     | 0.98             | 0.65             | 0.53             | 0.03       | 1.77             | 0.29               | 1.42               | 0.04       | 0.11     |
|                | LR    | 0.66             | 0.43             | 0.41             | 0.03       |                  |                    |                    |            | 0.16     |
|                | LW    | 0.44             | 0.27             | 0.22             | 0.02       |                  |                    |                    |            | 0.11     |

S = Synthetic boar, LR = Landrace (LR), LW = Large White (LW), and CB = three-way crossbred pigs

ADG = average daily gain, BF = back fat, and LD = loin depth

<sup>a</sup>BOA model, model with breed-specific relationship matrices

<sup>b</sup>G<sub>A</sub> model, model with genomic relationship matrix by allele frequencies obtained across the genotyped population

<sup>c</sup>G<sub>B</sub> model, model with genomic relationship matrix by breed-specific allele frequencies
